# Supplementary material
Source: Springer Nature journal article supplement (https://www.springermedizin.de/resource/supplementary/12935_2009_229_MOESM2_ESM.pdf/9541364)

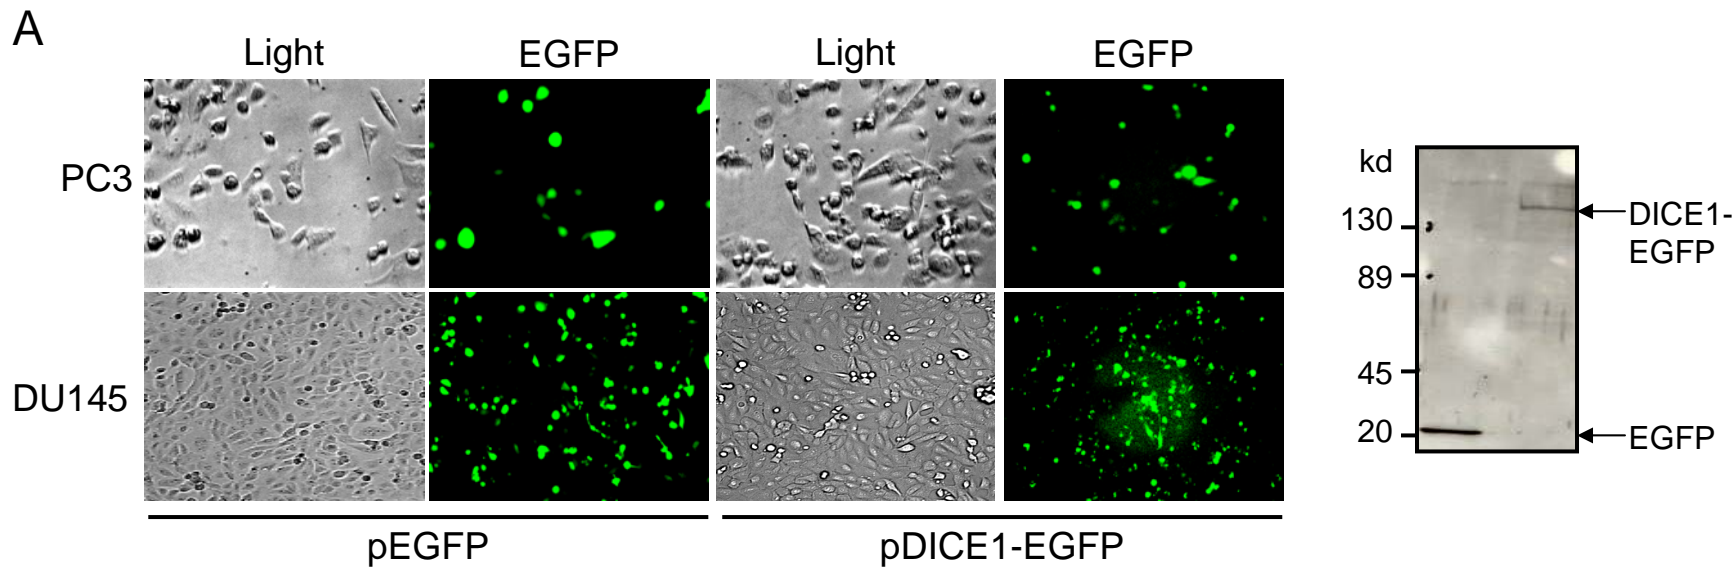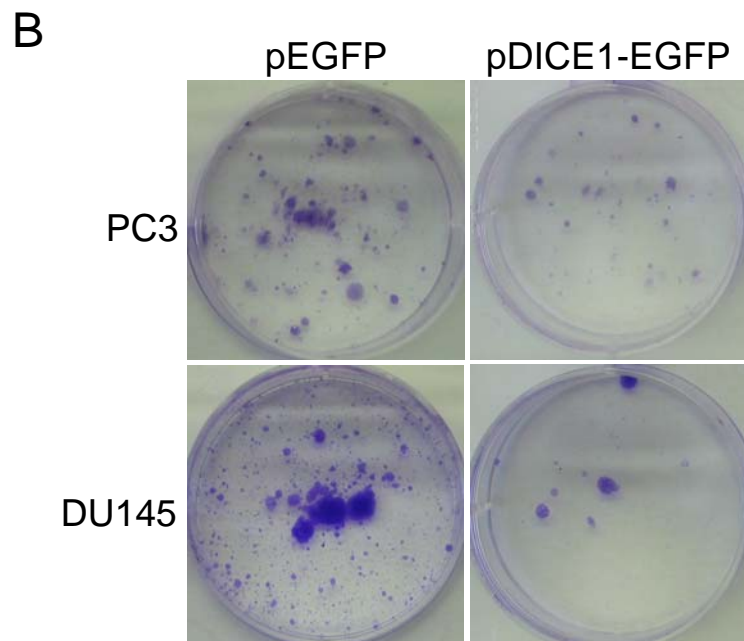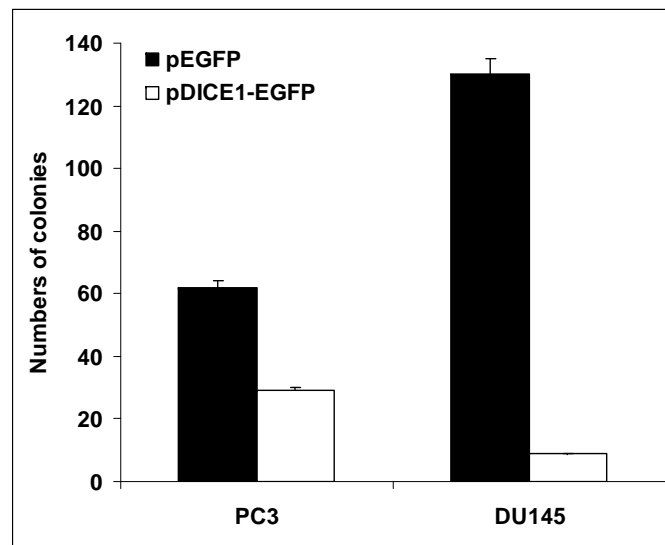

Supplement: MOESM2 [file 9541364]
